# Supplementary material
Source: PubMed Central journal article supplement (PMC5831467)
Supplement: jamasurg-152-3677-s001.pdf [file jamasurg-152-3677-s001.pdf]

## Supplementary Online Content

Yamashita S, Venkatesan AM, Mizuno T, et al. Remnant liver ischemia as a prognostic factor for cancer-specific survival after resection of colorectal liver metastases. *JAMA Surg*. Published online August 30, 2017. doi:10.1001/jamasurg.2017.2986

**eTable 1.** Univariable and Multivariable Analyses of NLR >5 at 3 Months After Hepatic Resection

**eTable 2.** Univariable and Multivariable Analysis of Recurrence-Free Survival

**eTable 3.** Multivariable Cox Regression Models for RFS and CSS Among 168 Patients Undergoing Preoperative Chemotherapy and Resection of CLM

This supplementary material has been provided by the authors to give readers additional information about their work.

**eTable 1.** Univariable and Multivariable Analyses of NLR >5 at 3 Months After Hepatic Resection

| Variable                                     | n   | NLR >5 at 3 months after hepatic resection |        | Univariable <i>P</i> | Odds ratio | 95% confidence interval | Multivariable <i>P</i> |
|----------------------------------------------|-----|--------------------------------------------|--------|----------------------|------------|-------------------------|------------------------|
|                                              |     | n                                          | (%)    |                      |            |                         |                        |
| All patients                                 | 202 | 31                                         | (15.3) |                      |            |                         |                        |
| Sex                                          |     |                                            |        |                      |            |                         |                        |
| M                                            | 118 | 20                                         | (16.9) | 0.45                 | NA         | NA                      | NA                     |
| F                                            | 84  | 11                                         | (13.1) |                      |            |                         |                        |
| Age, years                                   |     |                                            |        |                      |            |                         |                        |
| <60                                          | 128 | 18                                         | (14.1) | 0.51                 | NA         | NA                      | NA                     |
| ≥60                                          | 74  | 13                                         | (17.6) |                      |            |                         |                        |
| ASA                                          |     |                                            |        |                      |            |                         |                        |
| I/II                                         | 106 | 16                                         | (15.1) | 0.92                 | NA         | NA                      | NA                     |
| III                                          | 96  | 15                                         | (15.6) |                      |            |                         |                        |
| Diabetes mellitus                            |     |                                            |        |                      |            |                         |                        |
| Yes                                          | 18  | 1                                          | (5.6)  | 0.23                 | NA         | NA                      | NA                     |
| No                                           | 184 | 30                                         | (16.3) |                      |            |                         |                        |
| Hypertension                                 |     |                                            |        |                      |            |                         |                        |
| Yes                                          | 95  | 12                                         | (12.6) | 0.31                 | NA         | NA                      | NA                     |
| No                                           | 107 | 19                                         | (17.8) |                      |            |                         |                        |
| Use of anticoagulant agents                  |     |                                            |        |                      |            |                         |                        |
| Yes                                          | 48  | 9                                          | (18.8) | 0.45                 | NA         | NA                      | NA                     |
| No                                           | 154 | 22                                         | (14.3) |                      |            |                         |                        |
| NLR before hepatic resection                 |     |                                            |        |                      |            |                         |                        |
| >5                                           | 19  | 3                                          | (15.8) | 0.96                 | NA         | NA                      | NA                     |
| ≤5                                           | 183 | 28                                         | (15.3) |                      |            |                         |                        |
| Timing of diagnosis of primary tumor and CLM |     |                                            |        |                      |            |                         |                        |
| Synchronous                                  | 148 | 23                                         | (15.5) | 0.90                 | NA         | NA                      | NA                     |
| Metachronous                                 | 54  | 8                                          | (14.8) |                      |            |                         |                        |
| Pre-hepatic-resection chemotherapy           |     |                                            |        |                      |            |                         |                        |
| Yes                                          | 168 | 27                                         | (16.1) | 0.53                 | NA         | NA                      | NA                     |
| No                                           | 34  | 4                                          | (11.8) |                      |            |                         |                        |
| Pre-hepatic-resection chemotherapy cycles    |     |                                            |        |                      |            |                         |                        |
| ≤6                                           | 143 | 23                                         | (16.1) | 0.65                 | NA         | NA                      | NA                     |

|                                                      |         |              |      |    |    |    |
|------------------------------------------------------|---------|--------------|------|----|----|----|
| >6                                                   | 59      | 8<br>(13.6)  |      |    |    |    |
| Multiple lines of pre-hepatic-resection chemotherapy |         |              |      |    |    |    |
| Yes                                                  | 15      | 4<br>(26.7)  | 0.21 | NA | NA | NA |
| No                                                   | 18<br>7 | 27<br>(14.4) |      |    |    |    |
| Fluorouracil-based chemotherapy regimen              |         |              |      |    |    |    |
| Oxaliplatin                                          |         |              |      |    |    |    |
| Yes                                                  | 13<br>4 | 21<br>(15.7) | 0.86 | NA | NA | NA |
| No                                                   | 68      | 10<br>(14.7) |      |    |    |    |
| Irinotecan                                           |         |              |      |    |    |    |
| Yes                                                  | 29      | 5<br>(17.2)  | 0.76 | NA | NA | NA |
| No                                                   | 17<br>3 | 26<br>(15.0) |      |    |    |    |
| Use of bevacizumab                                   |         |              |      |    |    |    |
| Yes                                                  | 12<br>1 | 17<br>(14.0) | 0.53 | NA | NA | NA |
| No                                                   | 81      | 14<br>(17.3) |      |    |    |    |
| Use of anti-EGFR agents                              |         |              |      |    |    |    |
| Yes                                                  | 14      | 3<br>(21.4)  | 0.51 | NA | NA | NA |
| No                                                   | 18<br>8 | 28<br>(14.9) |      |    |    |    |
| Pre-hepatic-resection CEA value, ng/mL               |         |              |      |    |    |    |
| <5                                                   | 11<br>8 | 22<br>(18.6) | 0.12 | NA | NA | NA |
| ≥5                                                   | 84      | 9<br>(10.7)  |      |    |    |    |
| Portal vein embolization                             |         |              |      |    |    |    |
| Yes                                                  | 18      | 1 (5.6)      | 0.23 | NA | NA | NA |
| No                                                   | 18<br>4 | 30<br>(16.3) |      |    |    |    |
| Pringle maneuver                                     |         |              |      |    |    |    |
| Yes                                                  | 16<br>3 | 24<br>(14.7) | 0.62 | NA | NA | NA |
| No                                                   | 39      | 7<br>(17.9)  |      |    |    |    |
| Largest metastasis, cm                               |         |              |      |    |    |    |
| ≥3                                                   | 86      | 11<br>(12.8) | 0.39 | NA | NA | NA |
| <3                                                   | 11<br>6 | 20<br>(17.2) |      |    |    |    |
| Number of CLM                                        |         |              |      |    |    |    |
| Multiple                                             | 11<br>3 | 19<br>(16.8) | 0.51 | NA | NA | NA |
| Solitary                                             | 89      | 12<br>(13.4) |      |    |    |    |
| Residual tumor                                       |         |              |      |    |    |    |
| R1                                                   | 17      | 3<br>(17.6)  | 0.78 | NA | NA | NA |
| R0                                                   | 18<br>5 | 28<br>(15.1) |      |    |    |    |
| Operative time, min                                  |         |              |      |    |    |    |

|                                                 |         |              |        |      |           |        |
|-------------------------------------------------|---------|--------------|--------|------|-----------|--------|
| >180                                            | 12<br>5 | 22<br>(17.6) | 0.26   | NA   | NA        | NA     |
| ≤180                                            | 77      | 9<br>(11.7)  |        |      |           |        |
| Estimated blood loss, cc                        |         |              |        |      |           |        |
| ≥500                                            | 37      | 6<br>(16.2)  | 0.87   | NA   | NA        | NA     |
| <500                                            | 16<br>5 | 25<br>(15.2) |        |      |           |        |
| Red blood cell transfusion*                     |         |              |        |      |           |        |
| Yes                                             | 17      | 5<br>(29.4)  | 0.09   | 2.78 | 0.73-9.59 | 0.13   |
| No                                              | 18<br>5 | 26<br>(14.1) |        |      |           |        |
| Anatomic resection                              |         |              |        |      |           |        |
| No                                              | 12<br>9 | 23<br>(17.8) | 0.19   | NA   | NA        | NA     |
| Yes                                             | 73      | 8<br>(11.0)  |        |      |           |        |
| Surgical procedure                              |         |              |        |      |           |        |
| Major hepatic resection                         | 99      | 18<br>(18.2) | 0.27   | NA   | NA        | NA     |
| Minor hepatic resection                         | 10<br>3 | 13<br>(12.6) |        |      |           |        |
| RAS status                                      |         |              |        |      |           |        |
| Wild-type                                       | 12<br>9 | 19<br>(14.7) | 0.75   | NA   | NA        | NA     |
| Mutant                                          | 73      | 12<br>(16.4) |        |      |           |        |
| Major complication (≥Clavien-Dindo grade IIIa)* |         |              |        |      |           |        |
| Yes                                             | 51      | 17<br>(33.3) | <0.001 | 4.52 | 1.97-10.6 | <0.001 |
| No                                              | 15<br>1 | 14<br>(9.3)  |        |      |           |        |
| RLI after hepatic resection*                    |         |              |        |      |           |        |
| Grade ≥2                                        | 50      | 15<br>(30.0) | <0.001 | 3.08 | 1.31-7.20 | 0.01   |
| Grade ≤1                                        | 15<br>2 | 16<br>(10.5) |        |      |           |        |

\*Variables entered into the multinomial logistic regression analyses.

NLR, neutrophil-to-lymphocyte ratio; ASA, American Society of Anesthesiologists physical status classification; CLM, colorectal liver metastasis; EGFR, epidermal growth factor receptor; CEA, carcinoembryonic antigen; RLI, remnant liver ischemia; NA, not applicable.

**eTable 2.** Univariable and Multivariable Analysis of Recurrence-Free Survival

| Variable                           | N   | Recurrence-free survival, No. (%) <sup>*</sup> |           | Univariable P <sup>†</sup> | Hazard ratio     | Multivariable P <sup>‡</sup> |
|------------------------------------|-----|------------------------------------------------|-----------|----------------------------|------------------|------------------------------|
|                                    |     | 1 year                                         | 3 years   |                            |                  |                              |
| All patients                       | 202 | 107 (52.9)                                     | 62 (30.7) | NA                         | NA               | NA                           |
| Sex                                |     |                                                |           |                            |                  |                              |
| M                                  | 118 | 61 (51.7)                                      | 37 (31.0) | 0.88                       | NA               | NA                           |
| F                                  | 84  | 39 (46.2)                                      | 25 (29.8) |                            |                  |                              |
| Age at hepatic resection, y        |     |                                                |           |                            |                  |                              |
| ≥60                                | 74  | 35 (47.6)                                      | 20 (27.0) | 0.31                       | NA               | NA                           |
| <60                                | 128 | 72 (56.1)                                      | 42 (32.8) |                            |                  |                              |
| Primary tumor Location             |     |                                                |           |                            |                  |                              |
| Rectum                             | 41  | 19 (47.4)                                      | 11 (27.7) | 0.24                       | NA               | NA                           |
| Colon                              | 161 | 87 (54.3)                                      | 51 (31.4) |                            |                  |                              |
| T category <sup>§</sup>            |     |                                                |           |                            |                  |                              |
| T3/T4                              | 167 | 87 (52.0)                                      | 47 (28.4) | 0.09                       | 1.46 (0.91-2.48) | 0.12                         |
| T1/T2                              | 35  | 20 (57.4)                                      | 15 (41.8) |                            |                  |                              |
| Lymph node metastasis              |     |                                                |           |                            |                  |                              |
| Yes                                | 125 | 67 (53.5)                                      | 34 (26.9) | 0.45                       | NA               | NA                           |
| No                                 | 77  | 40 (52.1)                                      | 29 (37.1) |                            |                  |                              |
| Pre-hepatic-resection chemotherapy |     |                                                |           |                            |                  |                              |
| Yes                                | 168 | 84 (50.0)                                      | 50 (29.9) | 0.30                       | NA               | NA                           |
| No                                 | 34  | 23 (67.4)                                      | 12 (35.1) |                            |                  |                              |
| Liver metastases                   |     |                                                |           |                            |                  |                              |
| Operative time, min                |     |                                                |           |                            |                  |                              |
| >180                               | 125 | 63 (50.2)                                      | 35 (27.8) | 0.47                       | NA               | NA                           |
| ≤180                               | 77  | 44 (57.5)                                      | 27 (35.5) |                            |                  |                              |
| Estimated blood loss, cc           |     |                                                |           |                            |                  |                              |
| ≥500                               | 37  | 22 (58.4)                                      | 13 (34.1) | 0.90                       | NA               | NA                           |
| <500                               | 165 | 85 (51.8)                                      | 50 (30.1) |                            |                  |                              |
| Red blood cell transfusion         |     |                                                |           |                            |                  |                              |
| Yes                                | 179 | 9 (52.9)                                       | 7 (40.3)  | 0.87                       | NA               | NA                           |

|                                               |         |              |           |        |                  |        |
|-----------------------------------------------|---------|--------------|-----------|--------|------------------|--------|
| No                                            | 18<br>5 | 98<br>(53.0) | 55 (29.6) |        |                  |        |
| Surgical procedure                            |         |              |           |        |                  |        |
| Major hepatic resection                       | 99      | 52<br>(52.8) | 28 (27.9) | 0.51   | NA               | NA     |
| Minor hepatic resection                       | 10<br>3 | 55<br>(53.2) | 36 (34.6) |        |                  |        |
| CEA value at hepatic resection, ng/mL         |         |              |           |        |                  |        |
| ≥5                                            | 84      | 43<br>(51.6) | 20 (24.4) | 0.17   | NA               | NA     |
| <5                                            | 11<br>8 | 64<br>(54.0) | 41 (34.6) |        |                  |        |
| Timing of diagnosis of primary tumor and CLM§ |         |              |           |        |                  |        |
| Synchronous                                   | 14<br>8 | 73<br>(49.3) | 39 (26.4) | 0.02   | 1.31 (0.87-2.03) | 0.20   |
| Metachronous                                  | 54      | 34<br>(62.7) | 23 (41.9) |        |                  |        |
| Number of CLM§                                |         |              |           |        |                  |        |
| Multiple                                      | 11<br>3 | 52<br>(46.2) | 24 (21.5) | 0.002  | 1.43 (1.01-2.07) | 0.049  |
| Solitary                                      | 89      | 55<br>(61.6) | 38 (43.2) |        |                  |        |
| Largest metastasis, cm§                       |         |              |           |        |                  |        |
| ≥3                                            | 86      | 42<br>(49.3) | 23 (27.2) | 0.24   | NA               | NA     |
| <3                                            | 11<br>6 | 65<br>(55.7) | 39 (33.4) |        |                  |        |
| Residual tumor                                |         |              |           |        |                  |        |
| R1                                            | 17      | 11<br>(62.8) | 9 (52.3)  | 0.62   | NA               | NA     |
| R0                                            | 18<br>5 | 97<br>(52.4) | 55 (29.7) |        |                  |        |
| RAS status§                                   |         |              |           |        |                  |        |
| Mutant                                        | 73      | 31<br>(41.8) | 15 (20.0) | 0.001  | 1.50 (1.06-2.12) | 0.02   |
| Wild-type                                     | 12<br>9 | 76<br>(59.2) | 48 (37.2) |        |                  |        |
| Major morbidity (≥Clavien-Dindo grade IIIa)   |         |              |           |        |                  |        |
| Yes                                           | 51      | 24<br>(46.4) | 11 (21.2) | 0.28   | NA               | NA     |
| No                                            | 15<br>1 | 83<br>(55.0) | 51 (33.7) |        |                  |        |
| RLI after hepatic resection§                  |         |              |           |        |                  |        |
| Grade ≥2                                      | 50      | 13<br>(25.4) | 3 (6.4)   | <0.001 | 2.68 (1.84-3.86) | <0.001 |
| Grade ≤1                                      | 15<br>2 | 94<br>(62.1) | 60 (39.2) |        |                  |        |
| Post-hepatic-resection chemotherapy           |         |              |           |        |                  |        |
| Yes                                           | 18<br>4 | 95<br>(51.4) | 59 (32.2) | 0.68   | NA               | NA     |

|    |    |        |        |
|----|----|--------|--------|
| No | 18 | (70.5) | (14.7) |
|----|----|--------|--------|

---

\*Kaplan-Meier analysis.  
†Log-rank test.  
‡Cox regression model.  
§Variables entered into the Cox regression model.  
CEA, carcinoembryonic antigen; CLM, colorectal liver metastasis; RLI, remnant liver ischemia; NA, not applicable.

**eTable 3.** Multivariable Cox Regression Models for RFS and CSS Among 168 Patients Undergoing Preoperative Chemotherapy and Resection of CLM

|                                                        | RFS              |          | CSS              |          |
|--------------------------------------------------------|------------------|----------|------------------|----------|
|                                                        | HR (95% CI)      | <i>P</i> | HR (95% CI)      | <i>P</i> |
| Minor pathologic response to preoperative chemotherapy | 1.71 (1.15-2.57) | 0.01     | 2.02 (1.05-3.98) | 0.03     |
| Multiple liver metastases                              | 1.56 (1.02-2.43) | 0.04     | NS               |          |
| Largest metastasis ≥3 cm                               | NS               |          | 1.68 (1.01-3.00) | 0.049    |
| RAS mutation                                           | 2.08 (1.41-3.06) | <0.001   | 3.27 (1.85-5.81) | <0.001   |
| RLI grade ≥2 after hepatic resection                   | 2.60 (1.71-3.89) | <0.001   | 3.27 (1.81-5.88) | <0.001   |

RFS, recurrence-free survival; CSS, cancer-specific survival; CLM, colorectal liver metastases; RLI, remnant liver ischemia; HR, hazard ratio; CI, confidence interval; NS, not significant on univariable analysis.
